# Supplementary material for: Aqueous Extract from Cuminum cyminum L. Seed Alleviates Ovalbumin-Induced Allergic Rhinitis in Mouse via Balancing of Helper T Cells
Source: MDPI journal article supplement (doi:10.3390/foods11203224), 2022-10-15
Supplement: s1 [file s1]

## Dialysis treatment with MWCO 500

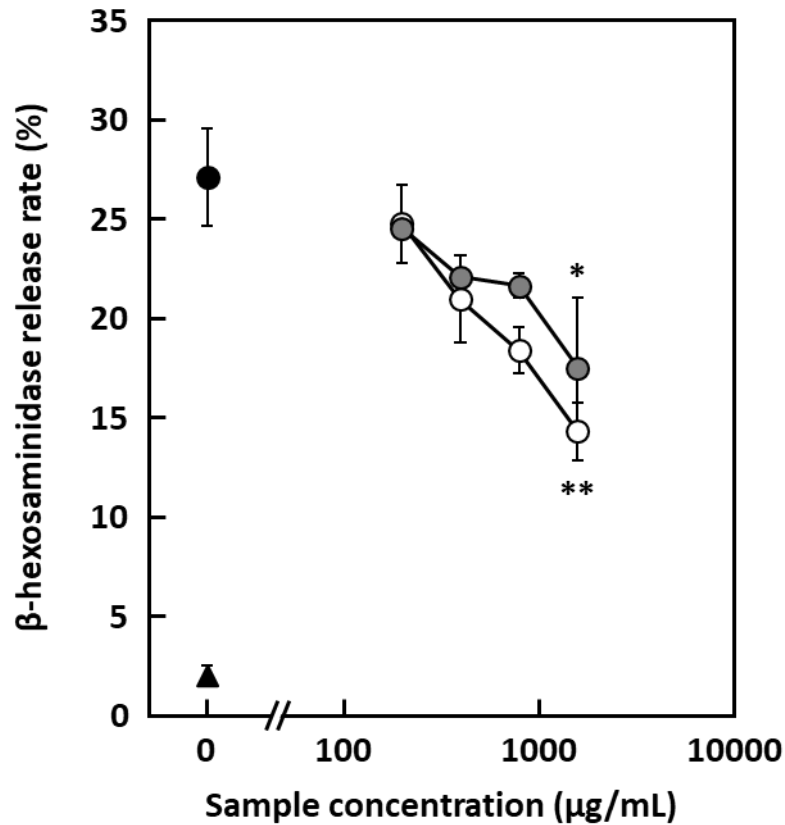

Figure S1. Effect of dialysis treatment on the anti-degranulation activity of cumin seed aqueous extract (CAE). Anti-dinitrophenyl (DNP) IgE-sensitized RBL-2H3 cells were treated with various concentrations of CAE or dialyzed CAE with degranulation induced by DNP- human serum albumin (HSA) stimulation. The control cells (closed circle) were treated with 10 mM sodium phosphate buffer as a vehicle and stimulated with DNP-HSA. The blank cells (closed square) were treated with 10 mM sodium phosphate buffer as a vehicle without DNP-HSA stimulation. Open circles and gray circles indicate CAE-treated cells and dialyzed CAE-treated cells, respectively. Data are expressed as means  $\pm$  SEM of three independent experiments. \* $p < 0.05$  and \*\* $p < 0.01$  against control cells by Tukey test.
